# Supplementary material for: The Factors Influencing Lithium Carbonate Crystallization in Spent Lithium-Ion Battery Leachate
Source: MDPI journal article supplement (doi:10.3390/pr12040753), 2024-04-08
Supplement: s1 [file s1]

**Table S1.** The content of components in the lithium-ion battery leachate

| Component       | LiCl  | Ni <sub>2</sub> Cl | Co <sub>2</sub> Cl | Mn <sub>2</sub> Cl | NaCl |
|-----------------|-------|--------------------|--------------------|--------------------|------|
| Content (mol/L) | 1.515 | 0.0023             | 0.0013             | 0.00014            | 0.66 |

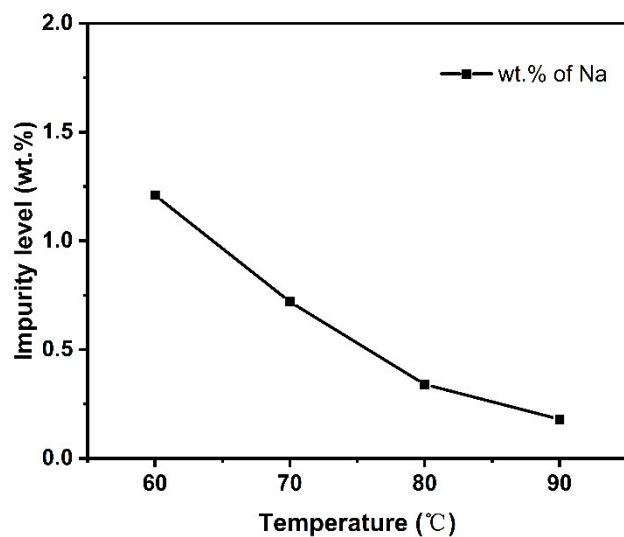

Figure S1. The impurity content in lithium carbonate obtained at different temperatures.

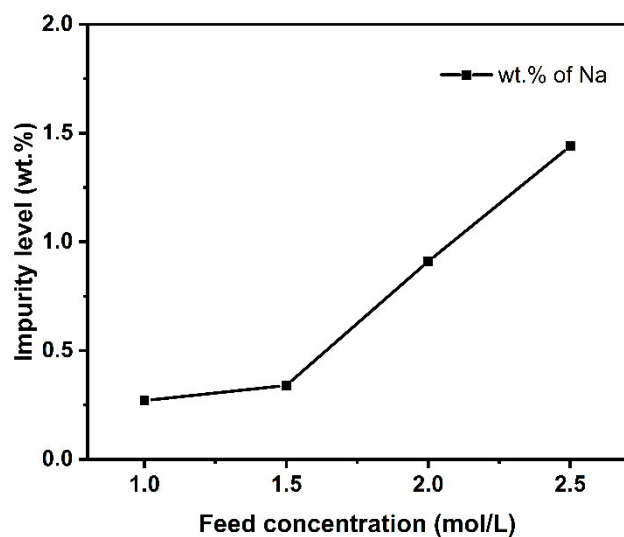

Figure S2. The impurity content in lithium carbonate obtained at different feed concentrations.

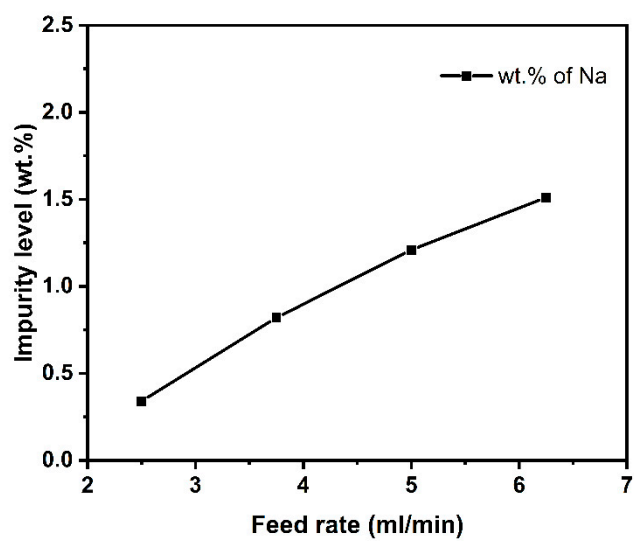

Figure S3. The impurity content in lithium carbonate obtained at different feed rates.

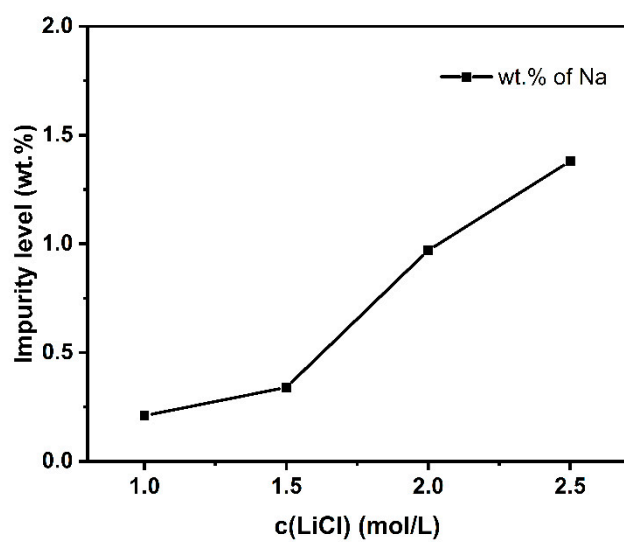

Figure S4. The impurity content in lithium carbonate obtained at different solvent concentrations.

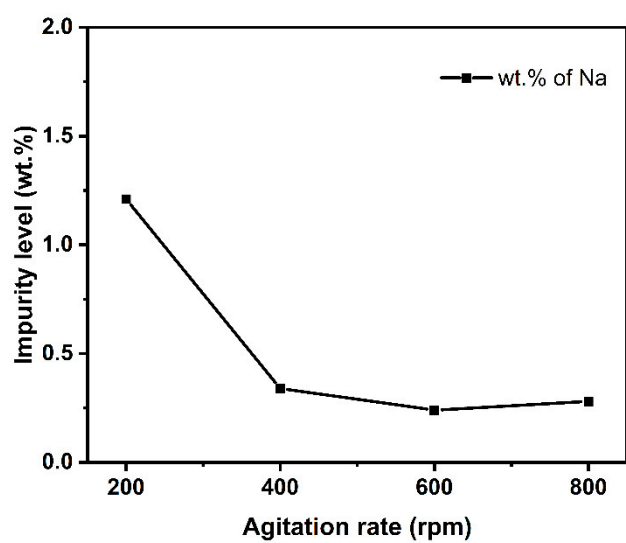

Figure S5. The impurity content in lithium carbonate obtained at different agitation rates.

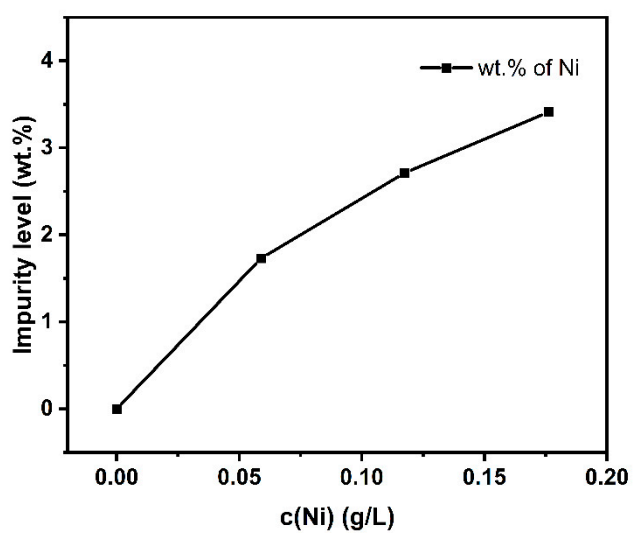

Figure S6. The impurity content in lithium carbonate obtained in the presence of nickel ions.

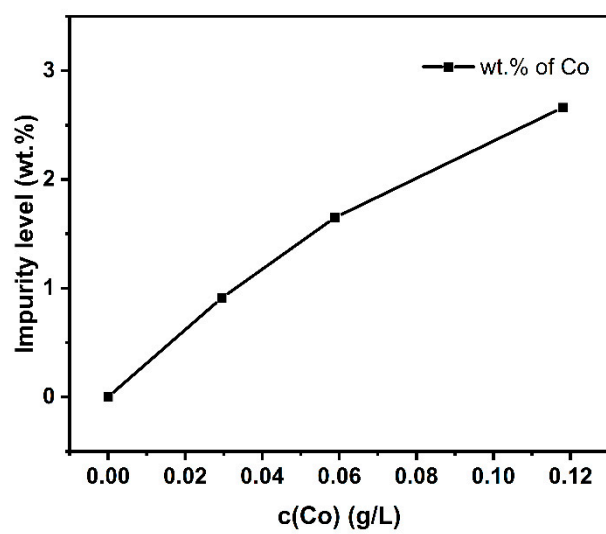

Figure S7. The impurity content in lithium carbonate obtained in the presence of cobalt ions.
